## Sleep regulation of the distribution of cortical firing rates

Daniel Levenstein<sup>1,2</sup>, Brendon O. Watson<sup>1</sup>, John Rinzel<sup>2,3</sup>, György Buzsáki<sup>1,2</sup>

<sup>1</sup>New York University Neuroscience Institute, <sup>2</sup>Center for Neural Science, and <sup>3</sup>Courant Institute of Mathematical Sciences, New York University, New York, New York 10016

### ABSTRACT

Sleep is thought to mediate both mnemonic and homeostatic functions. However, the mechanism by which this brain state can implement both the “selective” plasticity needed to consolidate novel memory traces as well as the “general” plasticity necessary to maintain a well-functioning neuronal system is unclear. Recent findings show that both of these functions differentially affect neurons based on their intrinsic firing rate, a ubiquitous neuronal heterogeneity. Furthermore, they are both implemented by the NREM slow oscillation, which also distinguishes neurons based on firing rate during sequential activity at the DOWN->UP transition. Together, these results suggest a mechanism by which the slow oscillation enacts homeostatic maintenance of the neuronal firing rate distribution, and “perturbation” of that activity by hippocampal replay acts to integrate new memory traces into the existing cortical network.

Correspondence:

[gyorgy.buzsaki@nyumc.org](mailto:gyorgy.buzsaki@nyumc.org)\* or  
[rinzeljm@gmail.com](mailto:rinzeljm@gmail.com)

NYU Neuroscience Institute  
New York University, Langone Medical Center  
East River Science Park, 450 East 29th Street, 9th Floor,  
Tel: 646-501-4523; Fax: 646-501-4529

Funding: This work was supported by the National Institutes of Health [grant numbers NS034994, MH54671, NS074015].

## Introduction

Extensive work on non-REM (NREM) sleep has revealed two major functions: memory consolidation [1] and homeostasis [2,3]. These functions are each thought to result from synaptic plasticity, but are directed towards two distinct goals. In the case of memory consolidation, specific synapses are thought to be “selectively” modified to strengthen particular memory traces. On the other hand, homeostatic function is thought to involve a “general” population-wide modification of synapses to maintain a stable neuronal system. While these plasticity mechanisms are often considered independently, recent findings indicate that both homeostasis and memory consolidation exhibit differential effects on neurons with respect to a ubiquitous neuronal heterogeneity - intrinsic firing rate. During homeostatic conditions, higher firing rate excitatory cells were found to exhibit a decrease in spiking activity while those with lower firing rates increase their spike rate [4,5]. On the other hand, after a learning task induced memory consolidation, recordings showed replay of spike sequences in hippocampal pyramidal cells wherein the tuning of higher firing rate cells is “rigid” or relatively unchanging with behavioral experience while low firing rate neurons act as a pool of “plastic” cells available to be incorporated into novel memory traces [6]. These findings are of particular interest given that spontaneous firing rates in these populations are distributed over three orders of magnitude in a highly skewed distribution, suggestive of a systematic overarching organization that allows for structured functional diversity *within* a local population of neurons of the same cell type [7] (Figure 1A).

In this review, we discuss how the neocortical NREM slow oscillation can mediate plasticity towards both homeostatic and mnemonic goals. We first briefly review how sleep state can differentially affect neurons based on the biophysical heterogeneities that result in firing rate variability across the population. We then propose a mechanism by which NREM sleep enacts homeostatic maintenance of the neuronal firing rate distribution. This novel homeostatic mechanism is necessary to prevent catastrophic destabilization from a widening distribution of firing rates and to maintain skewed general network statistics, which have beneficial properties for mnemonic function and network stability. Lastly, we discuss how perturbation of this general homeostatic modification by hippocampal replay events can result in the selective modifications necessary for memory consolidation.

## Biophysical heterogeneity as a source of the firing rate distribution

Heterogeneity, or variability in neuronal properties across a population, is a biological reality that has profound implications for the dynamics and function of neural circuits [8]. In one

ubiquitous example of heterogeneity, mean spike rates of individual neurons are distributed over three orders of magnitude in a highly skewed lognormal distribution [7](Figure 1A). Individual neurons maintain their rank in this distribution across behavioral states over the course of months [9,10], and in response to long-term perturbation of input a given neuron will return to a firing rate set-point [11]. Together, these observations suggest that the distribution of intrinsic firing rates reflects a fundamental *biophysical* heterogeneity in neuronal populations, and that the mean firing rate of a cell can act as a readily identifiable marker for that heterogeneity.

Roxin et al. [12] pointed out that the expansive nonlinearity of neuronal input-output relations will turn any normally-distributed variability in input into a skewed distribution of firing rates, providing a simple explanation for why this distribution should be approximately lognormal (Figure 1B). However, this idea is agnostic to the *source* of input heterogeneity, which could be inherited from external sources, or can be internal to the local population - deriving from variations in intrinsic excitability or the degree of local network innervation. In fact, there is experimental evidence supporting *both* of these “internal” heterogeneities [13,14]. For example, highly active neurons in the hippocampus are more likely to develop place fields in a novel environment, suggesting variability in excitability during place field assignment [15], and high firing rate pyramidal cells in the cortex are more likely to be connected to each other, forming a “rich club” of high firing rate neurons [16,17]. Rather than being independent, we suggest that excitability and network-related sources of neuronal heterogeneity are related and that this relation arises from, and is maintained by, neuronal dynamics during alternating sleep/wake cycles.

### **Biophysical heterogeneity as a point of differential regulation by sleep state**

The biophysical properties that set a neuron’s baseline firing rate are precisely those that are influenced by sleep regulatory forces. Sleep-associated loss of neuromodulatory tone changes the channel ecology and extracellular ionic milieu of forebrain neurons [18,19], both of which result in a decrease in neural gain [20,21]. In compensation for the gain-related decrease in intrinsic excitability, loss of modulatory tone during NREM sleep increases the efficacy of local excitatory synapses and decreases that from excitatory to inhibitory cells [10,21-24], transitioning the population from an externally-driven to an internally-driven regime. Together, these biophysical forces would be expected to narrow the firing rate distribution (Figure 1B), with the relatively large gain-related decrease in spiking of high-firing rate units complemented by a global increase in drive from the local network. High-density electrophysiological recordings confirm that the most pronounced effect of sleep on the distribution of cortical firing rates is a

narrowing of the distribution [4,25,26] - most prominent during NREM sleep (Figure 1C). It's important to note that although the shape of the distribution changes, the relative rank of cells in this distribution does not. This distribution narrowing shows a strong initial phase, indicative of the direct state-related effects discussed above, as well as a gradual narrowing over the course of NREM.

In addition to direct neuromodulatory effects, state-specific patterns of population dynamics can also affect neuronal firing rates. Evidence of such indirect effects is seen in correlations between spiking and the incidence or properties of specific sleep oscillations. Homeostatic changes in firing rate during NREM are correlated with slow wave activity [4,27], indicating that rate homeostasis is related to this prominent activity pattern of the NREM state. The within-NREM relation between the slow oscillation and decreased activity of high firing rate neurons persists beyond NREM sleep [4] (Figure 1D), indicating that the slow oscillation imparts a lasting effect on firing rates. While within-state effects on a neuron's activity level are the direct result of the neuronal environment during that state, some effects on neuronal firing rate can also persist into subsequent states. These lasting effects are presumably the result of state-specific plasticity [28] – state-specific neuromodulation of synaptic plasticity rules or the interaction of synaptic plasticity rules with state-specific dynamics.

### **Homeostatic function of the NREM slow oscillation**

What mechanisms could enact a lasting narrowing of the firing rate distribution during NREM slow oscillations? Synaptic plasticity is thought to require temporal coordination between synaptically connected neurons [29]. While this may seem straightforward in the stimulus-driven waking state (neurons associated with related stimuli will tend to be co-activated), neuronal activity during sleep is internally generated. This begs the question: how can self-generated activity self-organize to perform a desired plasticity function? Interestingly, spiking during the NREM slow oscillation reveals an intrinsic separation between high and low firing rate units. The slow oscillation is characterized by brief (30-200ms) population-wide DOWN states, after which local neurons begin firing in a population-wide UP state [4,30]. On examination, neurons fire in a statistically reliable sequence at the DOWN->UP transition [31] and a neuron's place in this ordering is correlated with that neuron's baseline firing rate, such that neurons with higher firing rates tend to spike before those with lower firing rates [32] (Figure 2). Both biophysical [33] and statistical [32] models indicate that this high-before-low rate neuron effect during transitions from quiescence to active firing states can be attributed to the heterogeneity in input between low and high firing rate neurons [12]. We hypothesize that this timing sequence also has

consequences: spike-timing dependent plasticity (STDP) during the DOWN->UP transition phase of the slow oscillation exhibits differential effects on high-firing vs low-firing neurons. The resulting network modifications can combat an inevitable consequence of synaptic plasticity in a spontaneously-active heterogeneous neural population: preferential strengthening of synapses involving high firing rate units.

### *Plasticity in a neuronal population with heterogeneous firing rates*

Despite the utility of Hebbian plasticity as a neurophysiological mechanism for learning and memory[34], models of neurons connected with Hebbian-plastic synapses demonstrate that networks governed by such a learning rule alone are unstable[35]. This instability is in part because Hebbian plasticity tends to strengthen strong synapses in spontaneously active networks even in the absence of external stimulation - cells that fire together are more likely to fire together again, resulting in a positive feedback loop in which synaptic weights increase ad infinitum [35-37]. While “homeostatic” plasticity rules can address this synaptic heterogeneity within a postsynaptic neuron by connecting a local (single-synapse) change to a global compensation, these rules fail to address a related problem that arises due to *neuronal* heterogeneity. Here we propose a mechanism by which a single learning rule can be employed by the experimentally-observed differential spike timing tendencies across states to exert opposing effects across those states and which not only accounts for but actually utilizes population heterogeneity to do so.

By definition, neurons obeying Hebbian plasticity rules must spike in order for synapses to be modified, and thus changes in synaptic weight happen at a rate proportional to the number of spikes a neuron fires. The higher the firing rate of the neurons involved, the more chances they have to spike coincidentally, and thus synapses involving high firing rate units have more opportunities for synaptic modification. As a result of this effect, spike-timing dependent plasticity (STDP) in an asynchronously-active heterogeneous population leads to asymmetric strengthening of synapses to neurons with higher spontaneous firing rates (Box 1). This suggests that firing rate heterogeneity in neuronal populations will inevitably lead to synaptic heterogeneity in local network structure. We refer to this drive of spontaneous network dynamics to modify network structure as *spontaneous plastic pressure (SPP)*, in contrast to the more commonly considered “evoked” plastic pressure to change network structure in response to a specific stimulus. From this perspective, SPP is an emergent property of the interaction between synaptic plasticity, neuronal heterogeneity, and population dynamics.

The implication of SPP in an asynchronous (wake-like) population is that variations in excitability between neurons will result in a network structure in which more excitable neurons are receiving stronger local input than less excitable neurons, widening the distribution of firing rates. While such a heterogeneous network has benefits for neuronal function (see next section), runaway feedback of this effect would destabilize the network, and needs to be counterbalanced. The recent experimental work outlined above indicates that wake state widening of the firing rate distribution is precisely the effect that this form of sleep-dependent homeostasis is counteracting. Importantly, the slow oscillation of non-REM is correlated with this effect [4], suggesting that this dynamic event is coordinating neuronal spiking to apply SPP that mediates homeostatic narrowing of the firing rate distribution.

#### *Mechanism of homeostatic function of the NREM Slow Oscillation*

The sequential pattern of neuronal firing during the DOWN->UP transition provides a putative mechanism by which the NREM slow oscillation can implement such a homeostatic function (Figure 2). Detailed biophysical models indicate that repeated sequential activity at the DOWN->UP transition is strengthened with STDP [38], and this sequential activity is accompanied by increased power in the LFP high gamma (80-100Hz) range [4] - the same time scale needed for synaptic modification via STDP [39,40]. In cortical slice, an LTP protocol during the onset of the UP state was found to effectively facilitate synaptic potentiation following an STDP rule with a minimal number of spike pairings [41]. Because high firing rate neurons tend to fire earlier than low firing rate neurons at the DOWN->UP transition, STDP will tend to increase synaptic weights from high firing rate to low firing rate units while decreasing weights from low firing rate to high firing rate units (Figure 2D). This redistribution of synaptic weight from high to low firing rate neurons would pull both ends of the firing rate distribution closer to the mean, applying SPP during the synchronous NREM state that acts as a homeostatic counter to that applied in the asynchronous wake state. While sleep-related narrowing of the firing rate distribution combats widening, it does not return the distribution to uniformity, indicating that alternating sleep/wake cycles are a crucial determinant of the general statistics of neuronal network structure and that they specifically act to maintain a network structure that supports skewed (but not too skewed) population statistics.

#### *Motivation for homeostatic maintenance of a skewed population*

Why maintain a skewed network structure? Theoretical work suggests that skewed populations have beneficial features for network performance. A pool of high firing rate network

hubs [16] can facilitate signal transmission between embedded feedforward subnetworks or spike sequences [42,43]. Furthermore, a population of high firing rate “rigid” and low firing rate “plastic” neurons [6] is beneficial for both system stability and mnemonic function. Stability analysis indicates that network stability relies on a small number of parameter-sensitive high firing rate cells, allowing the properties of many “sloppy” low firing rate cells to each change a great deal with learning without a negative impact on network dynamics [44]. These highly plastic network elements alone would allow for strong memories that are quickly formed but quickly overwritten, while rigid elements alone result in long-lasting but weak memories [45]. Together, a distributed memory system with the ability to transfer memory information between rigid and plastic elements maximizes both capacity and stability [46]. Memory consolidation during the NREM slow oscillation provides an opportune window for such rigid-plastic interaction.

### **Consolidation: the interaction of local and global plasticity during the NREM slow oscillation**

According to the "Two Stage Model" [47], consolidation involves the transfer of memory traces from short-term storage in the hippocampus to long term storage in the neocortex [48,49]. Transfer is thought to occur during hippocampal Sharp-Wave Ripple events (SPW-R)[50]. SPW-Rs are brief (~100ms) population bursts in hippocampal CA1 that are associated with “replay” of task-related patterns of spiking activity in both the hippocampus and neocortex and correlate with memory task performance [51-53]. Recent evidence suggests that the NREM slow oscillation is an integral part of the cortical response to SPW-Rs. SPW-Rs are temporally coordinated with slow wave activity [54], and have been found to both precede [53,55] and follow [56] the cortical DOWN state. In a closed-loop experiment using SPW-R—triggered electrical stimulation of slow waves in the neocortex, induced ripple-slow wave events were found to improve memory performance of novel objects [57]. During a subset of these evoked events, the “usual” sequential activation at the DOWN->UP transition was altered. Importantly, neurons that spiked at a different time in the sequence developed recognition fields to the novel object. This suggests that these neurons with perturbed activity were the benefactors of specific memory-related plasticity.

In order for hippocampal replay to transfer a memory trace to a cortical network, the neocortical population response must result in the integration of a novel pattern into the existing local network structure. Replay-induced perturbation of the sequential activation from high to low firing rate neurons at the DOWN->UP transition presents a window of opportunity for this

integration, possibly by strengthening synapses from rigid high firing rate cells to specific memory-related, low firing rate plastic neurons tagged by hippocampal replay events (Figure 3). In this way, the coupling of mnemonic and homeostatic function at the DOWN->UP transition could act as a vehicle for the interaction between local and global plasticity.

## **Conclusions**

The self-generated organization of neuronal activity during sleep promotes both network stabilization and mnemonic functions, which are achieved through the interaction between synaptic plasticity and state-specific patterns of population dynamics. Recent findings suggest a framework in which neuronal dynamics during the NREM slow oscillation act as a locus of both homeostatic and mnemonic functions. By this model, both functions are the result of synaptic plasticity during sequential activation from higher to lower firing rate neurons at the DOWN->UP transition. We hypothesize that the unperturbed DOWN->UP transition enacts homeostatic maintenance of the neuronal firing rate distribution. This novel form of homeostasis would compensate for the widening of the firing rate distribution due to spontaneous plastic pressure applied by asynchronous activity during wakefulness, and maintain the population in a skewed rate distribution. The perturbed DOWN->UP transition, on the other hand, enables hippocampal ripple-mediated memory consolidation, serving to integrate novel memory traces into the existing cortical framework while allowing for a more general homeostatic effect to occur in the background.



## BOX 1: SPP in an asynchronous state

How may we describe mathematically the plastic pressure applied by spontaneous activity in a population of neurons with heterogeneous firing rates? We define plastic pressure on synapse  $ij$  from presynaptic neuron  $j$  to postsynaptic neuron  $i$  as the expected rate of change of synaptic weight,

$$\langle \dot{w} \rangle_{ij} = \int d\tau W(\tau) P(t_i, (t + \tau)_j)$$

where  $W(\tau)$  is a plasticity rule that gives the change in synaptic weight as a function of delay  $\tau$  between spike times and  $P(t_i, (t + \tau)_j) = P(t_i) P((t + \tau)_j | t_i)$  is the probability of neurons  $i$  and  $j$  spiking with delay  $\tau$  [58]. Suppose that the dominant sources of rate correlation are synaptic interactions (i.e. the population is in an “asynchronous” state [59]). We represent their effect by adding  $K_{ij}(\tau)$  to the cross-correlation, i.e.  $P((t + \tau)_j | t_i) = P(t_j) + K_{ij}(\tau)$  assuming that  $K_{ij}(\tau)$  is small. The expression for plastic pressure then simplifies to

$$\begin{aligned} \langle \dot{w} \rangle_{ij} &= \int d\tau W(\tau) P(t_i) (P(t_j) + K_{ij}(\tau)) \\ &= r_i r_j \int d\tau W(\tau) + r_i \int d\tau W(\tau) K_{ij}(\tau) \end{aligned}$$

in which the first term, SPP due to asymmetry in the STDP rule, depends on the rates of both neuron  $i$  and neuron  $j$ , while the second term, SPP from synaptic factors, depends on the *rate of the postsynaptic neuron  $i$  only*. There are two contributions to the synaptic correlation term,  $K_{ij}(\tau)$ . One,  $w_{ij} k(\tau)$ , for spikes added to neuron  $i$  due to synapse  $ij$ , and one for spikes added to neuron  $j$  due to synapse  $ji$ ,  $w_{ji} k(-\tau)$ , giving us:  $K_{ij}(\tau) = w_{ij} k(\tau) + w_{ji} k(-\tau)$ . With this recognition we express the pressure on synapse  $ij$  as

$$\langle \dot{w} \rangle_{ij} = r_i r_j \int d\tau W(\tau) + r_i w_{ij} W_{k+} + r_i w_{ji} W_{k-}$$

where  $W_{k+/-} = \int d\tau W(\tau) k(+/-\tau)$ . The term with  $W_{k+}$  represents the positive SPP on synapse  $ij$  due to synapse  $ij$ , it is proportional to the firing rate of neuron  $i$  and the current weight  $w_{ij}$ . The term with  $W_{k-}$  corresponds to the negative SPP on synapse  $ij$  due to synapse  $ji$  and is proportional to the firing rate of neuron  $i$  and the current weight  $w_{ji}$ .

We now ask, *how much more will SPP during asynchronous activity strengthen synapses from lower firing rate neurons to higher firing rate neurons than those in the reverse direction?*

$$\Delta_{ij} \langle \dot{w} \rangle = \langle \dot{w} \rangle_{ij} - \langle \dot{w} \rangle_{ji}$$

$$= r_i w_{ij} W_{k+} + r_i w_{ji} W_{k-} - r_j w_{ji} W_{k+} - r_j w_{ij} W_{k-}$$

We illustrate schematically below the relative SPP between two neurons of different firing rates for 3 simplified cases: **case 1**, in which synaptic weights are equal and unitary post/pre-synaptic pressure are balanced ( $w_{ij} = w_{ji}$  and  $W_{k+} = -W_{k-}$ ), **case 2**, in which synaptic weights are not equal, and **case 3**, in which unitary post/pre-synaptic pressure are not balanced (say,  $W_{k+} > W_{k-}$ ). These cases show first, that a potentiation-favoring bias in the STDP rule (as is seen in standard STDP experiments) will preferentially strengthen synapses *from* lower *to* higher firing rate neurons. Secondly, any synaptic asymmetry (i.e.  $w_{ij} \neq w_{ji}$ ) will be accentuated *more* for synapses that involve neurons of higher firing rate. Together, these results indicate that synapses *to* and *between* high firing rate neurons will be preferentially strengthened by asynchronous spontaneous activity.

## **Acknowledgements**

The authors would like to thank Rachel Swanson for extensive comments during writing of the manuscript, Andres Grosmark for comments and ongoing discussion of relevant topics, and all members of the Buzsáki lab for continuously insightful discussion.

## REFERENCES

1. Rasch B, Born J: **About sleep's role in memory.** *Physiol. Rev.* 2013, doi:10.1152/physrev.00032.2012.—Over.
2. Tononi G, Cirelli C: **Sleep and synaptic homeostasis: a hypothesis.** *Brain Research Bulletin* 2003, **62**:143–150.
3. Tononi G, Cirelli C: **Sleep function and synaptic homeostasis [Internet].** *Sleep Medicine Reviews* 2006, **10**:49–62.
4. Watson BO, Levenstein D, Greene JP, Gelinás JN, Buzsáki G: **Network Homeostasis and State Dynamics of Neocortical Sleep.** *Neuron* 2016, **90**:839–852.
5. Miyawaki H, Diba K: **Regulation of Hippocampal Firing by Network Oscillations during Sleep.** *Current biology* 2016, doi:10.1016/j.cub.2016.02.024.
6. Grosmark AD, Buzsáki G: **Diversity in neural firing dynamics supports both rigid and learned hippocampal sequences.** *Science* 2016, **351**:1440–1443.
7. Buzsáki G, Mizuseki K: **The log-dynamic brain: how skewed distributions affect network operations.** *Nature Publishing Group* 2014, **15**:264–278.
8. Edelman GM: *Neural Darwinism: The theory of neuronal group selection.* Basic Books; 1987.
9. Okun M, Lak A, Carandini M, Harris KD: **Long Term Recordings with Immobile Silicon Probes in the Mouse Cortex.** *PLoS ONE* 2016, **11**:e0151180–17.
10. Mizuseki K, Buzsáki G: **Preconfigured, skewed distribution of firing rates in the hippocampus and entorhinal cortex.** *Cell Rep* 2013, **4**:1010–1021.
11. Hengen KB, Torrado Pacheco A, McGregor JN, Van Hooser SD, Turrigiano GG: **Neuronal Firing Rate Homeostasis Is Inhibited by Sleep and Promoted by Wake.** *Cell* 2016, **165**:180–191.
12. Roxin A, Brunel N, Hansel D, Mongillo G, van Vreeswijk C: **On the distribution of firing rates in networks of cortical neurons.** *Journal of Neuroscience* 2011, **31**:16217–16226.
13. Witharana WKL, Cardiff J, Chawla MK, Xie JY, Alme CB, Eckert M, Lapointe V, Demchuk A, Maurer AP, Trivedi V, et al.: **Nonuniform allocation of hippocampal neurons to place fields across all hippocampal subfields.** *Hippocampus* 2016, **26**:1328–1344.
14. Koulakov AA, Hromádka T, Zador AM: **Correlated connectivity and the distribution of firing rates in the neocortex.** *Journal of Neuroscience* 2009, **29**:3685–3694.

15. Rich PD, Liaw HP, Lee AK: **Large environments reveal the statistical structure governing hippocampal representations.** *Science* 2014, doi:10.1126/science.1251418.  
\*Using extracellular hippocampal recordings during exploration of a large (48-meter-long) novel track, the authors find that individual neurons have different propensity to form place fields at random locations on the track and that the distribution of this propensity across the population followed a skewed distribution.
16. Yassin L, Benedetti BL, Jouhannau J-S, Wen JA, Poulet J, Barth AL: **An embedded subnetwork of highly active neurons in the neocortex.** *Neuron* 2010, **68**:1043–1050.
17. Nigam S, Shimono M, Ito S, Yeh F-C, Timme NM, Myroshnychenko M, Lapish CC, Tosi Z, Hottowy P, Smith WC, et al.: **Rich-Club Organization in Effective Connectivity among Cortical Neurons.** *Journal of Neuroscience* 2016, **36**:670–684.  
\*Using high-density electrode array recordings of cortical slice cultures and in vivo recordings, the authors find a lognormal distribution of firing rates in which neurons of higher firing rate are strongly connected to each other as quantified by a transfer entropy metric of effective connectivity, forming a "rich club".
18. Marder E, Goaillard J-M: **Variability, compensation and homeostasis in neuron and network function.** *Nat Rev Neurosci* 2006, **7**:563–574.
19. Ding F, O'Donnell J, Xu Q, Kang N, Goldman N, Nedergaard M: **Changes in the composition of brain interstitial ions control the sleep-wake cycle.** *Science* 2016, **352**:550–555.
20. Costa MS, Born J, Claussen JC, Martinetz T: **Modeling the effect of sleep regulation on a neural mass model.** *J Comput Neurosci* 2016, doi:10.1007/s10827-016-0602-z.
21. Hasselmo ME, McGaughy J: **High acetylcholine levels set circuit dynamics for attention and encoding and low acetylcholine levels set dynamics for consolidation.** *Prog. Brain Res.* 2004, **145**:207–231.
22. Mielke JG, Ahuja TK, Comas T, Mealing GAR: **Choline-mediated depression of hippocampal synaptic transmission.** *Nutritional Neuroscience* 2013, **14**:186–194.
23. Muñoz W, Rudy B: **Spatiotemporal specificity in cholinergic control of neocortical function.** *Curr Opin Neurobiol* 2014, **26**:149–160.
24. Olcese U, Bos JJ, Vinck M, Lankelma JV, van Mourik-Donga LB, Schlumm F, Pennartz CMA: **Spike-Based Functional Connectivity in Cerebral Cortex and Hippocampus: Loss of Global Connectivity Is Coupled to Preservation of Local Connectivity During Non-REM Sleep.** *The Journal of Neuroscience* 2016, **36**:7676–7692.
25. Hobson JA, McCarley RW: **Cortical unit activity in sleep and waking.** *Electroencephalogr Clin Neurophysiol* 1971, **30**:97–112.
26. Grosmark AD, Mizuseki K, Pastalkova E, Diba K, Buzsáki G: **REM Sleep Reorganizes Hippocampal Excitability.** *Neuron* 2012, **75**:1001–1007.

27. Vyazovskiy VV, Olcese U, Lazimy YM, Faraguna U, Esser SK, Williams JC, Cirelli C, Tononi G: **Cortical Firing and Sleep Homeostasis**. *Neuron* 2009, **63**:865–878.  
\*Concrete evidence for sleep-related decrease of cortical neuronal firing rates and wake-related increase in firing rates, in line with the Synaptic Homeostasis of Tononi and Cirelli.
28. Vyazovskiy VV, Cirelli C, Pfister-Genskow M, Faraguna U, Tononi G: **Molecular and electrophysiological evidence for net synaptic potentiation in wake and depression in sleep**. *Nature neuroscience* 2008, **11**:200–208.
29. Markram H, Lübke J, Frotscher M, Sakmann B: **Regulation of synaptic efficacy by coincidence of postsynaptic APs and EPSPs**. *Science* 1997, **275**:213–215.
30. Steriade M, Nunez A, Amzica F: **A novel slow (< 1 Hz) oscillation of neocortical neurons in vivo: depolarizing and hyperpolarizing components**. *The Journal of Neuroscience* 1993, **13**:3252–3265.
31. Luczak A, Bartho P, Marguet SL, Buzsáki G, Harris KD: **Sequential structure of neocortical spontaneous activity in vivo**. *Proc. Natl. Acad. Sci. U.S.A.* 2007, **104**:347–352.
32. Peyrache A, Benchenane K, Khamassi M, Wiener SI, Battaglia FP: **Sequential Reinstatement of Neocortical Activity during Slow Oscillations Depends on Cells' Global Activity**. *Front. Syst. Neurosci.* 2010, **3**:18.  
\*An analysis of sequential activity at the DOWN->UP transition during NREM sleep showing that the sequence in which neurons fire at the start of UP states is predicted by their firing rate: high firing rate neurons fire earlier after the start of UP states and low firing rate neurons fire later.
33. Vladimirovski BB, Tabak J, O'Donovan MJ, Rinzel J: **Episodic activity in a heterogeneous excitatory network, from spiking neurons to mean field**. *J Comput Neurosci* 2008, **25**:39–63.
34. Hebb DO: *The Organization of Behavior*. Wiley, New York; 1949.
35. Miller KD, MacKay D: **The role of constraints in Hebbian learning**. *Neural Computation* 1994, [no volume].
36. Zenke F, Gerstner W: **Cooperation across timescales between Hebbian and homeostatic plasticity**. *Philosophical Transactions of the Royal Society B: Biological Sciences* 2016, [no volume].
37. Zenke F, Agnes EJ, Gerstner W: **Diverse synaptic plasticity mechanisms orchestrated to form and retrieve memories in spiking neural networks**. *Nature Communications* 2015, **6**:6922.
38. Wei Y, Krishnan GP, Bazhenov M: **Synaptic Mechanisms of Memory Consolidation during Sleep Slow Oscillations**. *Journal of Neuroscience* 2016, **36**:4231–4247.

- \*Using a biophysically-detailed thalamocortical network model in a NREM-like regime, the authors found that sequential activity at the onset of the UP state resulted in STDP-mediated changes in synaptic weights, potentiating synapses from earlier-firing to later-firing neurons and depressing synapses from later-firing to earlier-firing neurons.
39. Lee S, Sen K, Kopell N: **Cortical Gamma Rhythms Modulate NMDAR-Mediated Spike Timing Dependent Plasticity in a Biophysical Model.** *PLoS Comp Biol* 2009, **5**:e1000602–13.
  40. Buzsáki G, Wang XJ: **Mechanisms of gamma oscillations.** *Annu. Rev. Neurosci.* 2012, **35**:203–225.
  41. Kruskal PB, Li L, MacLean J: **Circuit reactivation dynamically regulates synaptic plasticity in neocortex.** *Nature Communications* 2013, **4**.
  42. Jahnke S, Memmesheimer R-M, Timme M: **Hub-activated signal transmission in complex networks.** *Phys Rev E Stat Nonlin Soft Matter Phys* 2014, **89**:030701.
  43. Timme NM, Ito S, Myroshnychenko M, Nigam S, Shimono M, Yeh F-C, Hottowy P, Litke AM, Beggs JM: **High-Degree Neurons Feed Cortical Computations.** *PLoS Comp Biol* 2016, **12**:e1004858–31.
  44. Panas D, Amin H, Maccione A, Muthmann O, van Rossum M, Berdondini L, Hennig MH: **Sloppiness in spontaneously active neuronal networks.** *Journal of Neuroscience* 2015, **35**:8480–8492.  
\*Using parametric models of network activity in cultured hippocampal neurons and in vivo cortical neurons, the authors analyzed the sensitivity of model behavior to parameter perturbations. They found that the parameters for most neurons were "sloppy", or that model dynamics were insensitive to parameter changes, while a small subset of neurons were associated with sensitive parameters. Parameter sensitivity was highly correlated with neuronal firing rates.
  45. Roxin A, Fusi S: **Efficient Partitioning of Memory Systems and Its Importance for Memory Consolidation.** *PLoS Comp Biol* 2013, **9**:e1003146–13.
  46. Benna MK, Fusi S: **Computational principles of synaptic memory consolidation.** *Nature neuroscience* 2016, doi:10.1038/nn.4401.  
\*Using a general class of synaptic models, the authors show that by combining a range of rigid and plastic variables memory systems can show a substantial improvement in stability and capacity over previous models. This is achieved by initially storing memories in fast variables and progressively transferring them to slower variables.
  47. Buzsáki G: **Two-stage model of memory trace formation: a role for "noisy" brain states.** *Neuroscience* 1989, **31**:551–570.
  48. McClelland JL, McNaughton BL, O'Reilly RC: **Why there are complementary learning systems in the hippocampus and neocortex: insights from the successes and failures of connectionist models of learning and memory.** *Psychological Review* 1995, **102**:419–

- 457.
49. Marr D: **Simple memory: a theory for archicortex.** *Philos. Trans. R. Soc. Lond., B, Biol. Sci.* 1971, **262**:23–81.
  50. Buzsáki G: **Hippocampal sharp wave-ripple: A cognitive biomarker for episodic memory and planning.** *Hippocampus* 2015, **25**:1073–1188.
  51. Wilson MA, McNaughton BL: **Reactivation of hippocampal ensemble memories during sleep.** *Science* 1994, **265**:676–679.
  52. Girardeau GJ, Benchenane K, Wiener SI, Buzsáki G, Zugaro M: **Selective suppression of hippocampal ripples impairs spatial memory.** *Nature neuroscience* 2009, **12**:1222–1223.
  53. Peyrache A, Khamassi M, Benchenane K, Wiener SI, Battaglia FP: **Replay of rule-learning related neural patterns in the prefrontal cortex during sleep.** *Nature neuroscience* 2009, **12**:919–926.
  54. Sirota A, Csicsvari J, Buhl D, Buzsáki G: **Communication between neocortex and hippocampus during sleep in rodents.** *Proc. Natl. Acad. Sci. U.S.A.* 2003, **100**:2065–2069.
  55. Peyrache A, Battaglia FP, Destexhe A: **Inhibition recruitment in prefrontal cortex during sleep spindles and gating of hippocampal inputs.** *PNAS* 2011, **108**:17207–17212.
  56. Battaglia FP, Sutherland GR, McNaughton BL: **Hippocampal sharp wave bursts coincide with neocortical “up-state” transitions.** *Learn. Mem.* 2004, **11**:697–704.
  57. Maingret N, Girardeau GJ, Todorova R, Goutierre M, Zugaro M: **Hippocampo-cortical coupling mediates memory consolidation during sleep.** *Nature neuroscience* 2016, doi:10.1038/nn.4304.  
\*Using closed-loop stimulation of cortical slow waves, the authors showed that temporal coordination of slow waves and hippocampal SPW-Rs promotes memory consolidation by perturbing sequential activity at the slow wave DOWN->UP transition.
  58. Gerstner W, Kistler WM, Naud R, Paninski L: *Neuronal dynamics: From single neurons to networks and models of cognition.* 2014.
  59. Renart A, la Rocha de J, Bartho P, Hollender L, Parga N, Reyes AD, Harris KD: **The asynchronous state in cortical circuits.** *Science* 2010, **327**:587–590.



## FIGURE LEGENDS

**Figure 1.** Skewed distribution of firing rates in sleep and wake. **A:** Skewed distribution of spontaneous firing rates on a linear and log scale. (from Mizuseki and Buzsáki 2013) **B:** Supra-linear neuronal input-output (F-I) curve as source of the firing rate skew and mechanism for within-NREM narrowing of the firing rate distribution. Loss of neuromodulatory tone during NREM (i) decreases the gain of the F-I curve and (ii) increases the strength of local connections. Together, the expected result is to narrow the distribution of firing rates. (adapted from Roxin et al 2011). **C:** Firing rate of high and low rate sextile groups over wake (W) and sleep (S) states (M: Microarousals, R: REM, N: NREM) for an example recording session (top), and mean of all firing rate sextiles during sleep over all recordings (bottom).

**Figure 2.** Sequential activity from high to low firing rate cells at the DOWN->UP transition. **A:** Sequential activity at the DOWN->UP transition is consistent across sleep. Peri-event time histogram for the first spike after the UP state onset for first half and second half of sleep from a dataset of cortical excitatory cells. **B:** Onset time is correlated with mean spike rate. **C:** Mean pairwise firing rate correlation between high and low firing rate cells during NREM. **D:** Spontaneous plastic pressure between low (smaller circles) and high (larger circles) firing rate cells during NREM due to high-to-low firing rate sequential activity at the DOWN->UP transition.

**Figure 3.** Summary: Spontaneous plastic pressure in different contexts. STDP during asynchronous spiking applies SPP that strengthens synapses to high firing rate units, widening the firing rate distribution. STDP during sequential high-to-low rate spiking during the NREM DOWN->UP transition applies SPP that strengthens synapses from high firing rate units to low firing rate units. STDP during SPW-R-mediated perturbation of sequential activity at the DOWN->UP transition strengthens memory-specific synapses, resulting in stimulus-specific spiking at future stimulus presentations.

**Box figure.** Spontaneous plastic pressure due to asynchronous activity. Schematic of the SPP asymmetry ( $\Delta_{ij}\langle\dot{w}\rangle$ ) between a bidirectionally connected high firing rate (large circles) and a low firing rate (smaller circles) neuron pair as a function of the synaptic weights, STDP rule, and relative firing rate.

**Figure 1**

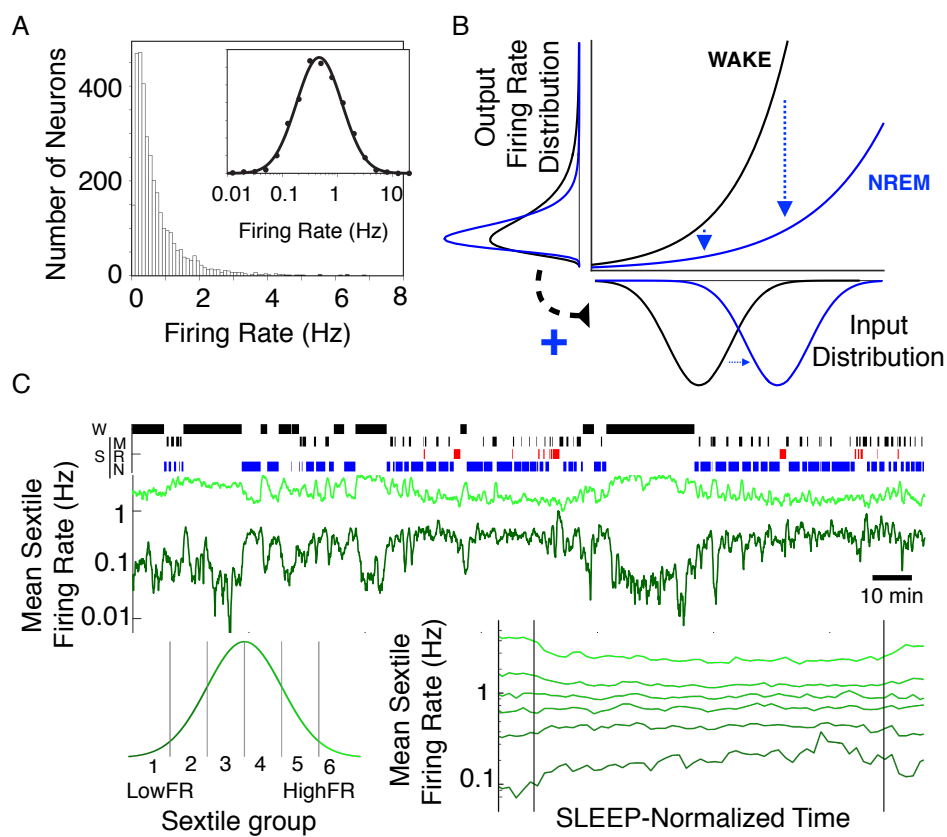

**Figure 2**

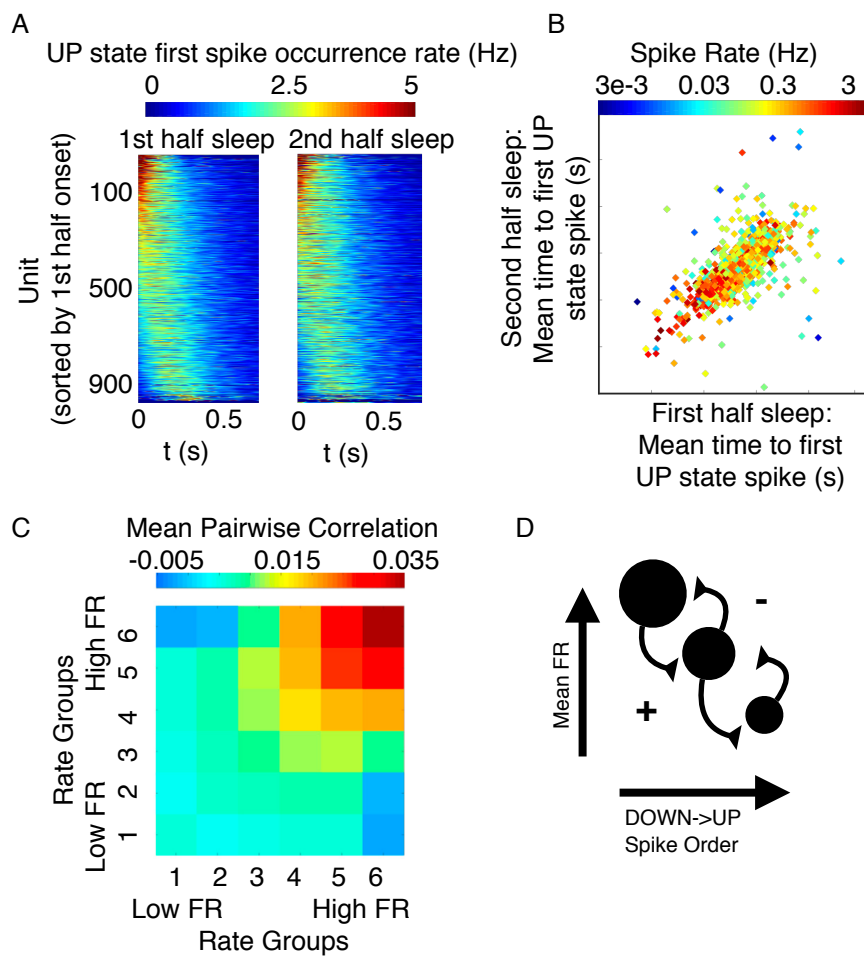

**Figure 3**

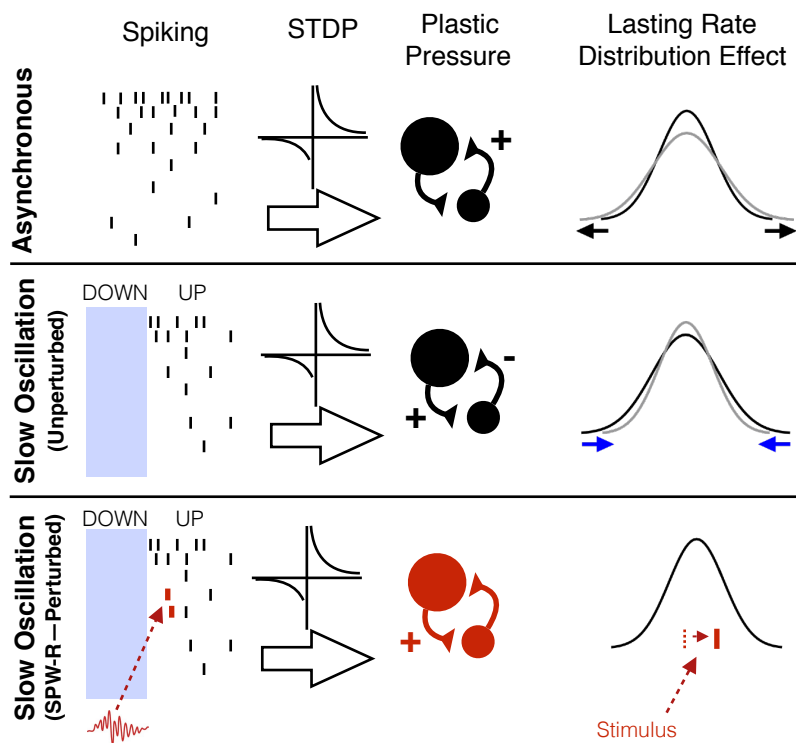

## Box Figure

### Case 1

Equal weight synapses,  
symmetric STDP rule  
-No asymmetry in plastic pressure

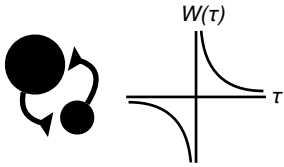

### Case 2

Different weight synapses  
-SPP Strengthens stronger synapse  
-Effect is stronger for high firing rate pairs

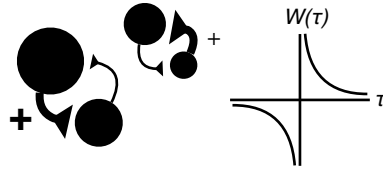

### Case 3

STDP rule stronger potentiation  
than depression  
-SPP Strengthens synapse TO  
high firing rate neuron

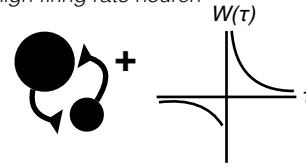

Source: http://biorxiv.org/content/10.1101/084731v1.full.pdf
